# Supplementary material for: The role of the gut in insect chilling injury: cold-induced disruption of osmoregulation in the fall field cricket,Gryllus pennsylvanicus
Source: Oxford University Press journal article supplement (doi:10.1242/jeb.051540), 2011-02-09
Supplement: jeb051540tabless1-s3.pdf [file jeb051540tabless1-s3.pdf]

Table S1. Results of false discovery rate corrected *t*-tests and general linear models of hemolymph and muscle ion concentrations and calculated muscle equilibrium potentials of *Gryllus pennsylvanicus* exposed to 0°C

| Ion              | Test                 | Variable                | d.f. | Statistic       | <i>P</i>         |
|------------------|----------------------|-------------------------|------|-----------------|------------------|
| Na <sup>+</sup>  | <i>t</i> -test       | Hemolymph concentration | 10   | <i>t</i> =3.26  | <b>0.024</b>     |
|                  |                      | Muscle concentration    | 10   | <i>t</i> =4.385 | <b>0.008</b>     |
|                  |                      | Equilibrium potential   | 10   | <i>t</i> =0.77  | 0.461            |
|                  | General linear model | Hemolymph concentration | 2,58 | <i>F</i> =13.35 | <b>&lt;0.001</b> |
|                  |                      | Muscle concentration    | 2,58 | <i>F</i> =0.27  | 0.606            |
|                  |                      | Equilibrium potential   | 2,64 | <i>F</i> =0.91  | 0.345            |
|                  | <i>t</i> -test       | Hemolymph concentration | 11   | <i>t</i> =4.13  | <b>0.008</b>     |
|                  |                      | Muscle concentration    | 10   | <i>t</i> =0.12  | 0.907            |
|                  |                      | Equilibrium potential   | 10   | <i>t</i> =2.11  | 0.244            |
| K <sup>+</sup>   | General linear model | Hemolymph concentration | 2,58 | <i>F</i> =31.23 | <b>&lt;0.001</b> |
|                  |                      | Muscle concentration    | 2,64 | <i>F</i> =0.01  | 0.786            |
|                  |                      | Equilibrium potential   | 2,64 | <i>F</i> =45.74 | <b>&lt;0.001</b> |
|                  | <i>t</i> -test       | Hemolymph concentration | 11   | <i>t</i> =2.85  | <b>0.032</b>     |
|                  |                      | Muscle concentration    | 10   | <i>t</i> =0.84  | 0.563            |
|                  |                      | Equilibrium potential   | 10   | <i>t</i> =1.17  | 0.357            |
|                  | General linear model | Hemolymph concentration | 2,64 | <i>F</i> =0.70  | 0.398            |
|                  |                      | Muscle concentration    | 2,64 | <i>F</i> =0.01  | 0.955            |
|                  |                      | Equilibrium potential   | 2,64 | <i>F</i> =1.83  | 0.181            |
| Ca <sup>2+</sup> | <i>t</i> -test       | Hemolymph concentration | 10   | <i>t</i> =1.86  | 0.144            |
|                  |                      | Muscle concentration    | 9    | <i>t</i> =0.15  | 0.907            |
|                  |                      | Equilibrium potential   | 9    | <i>t</i> =1.24  | 0.357            |
|                  | General linear model | Hemolymph concentration | 2,59 | <i>F</i> =16.03 | <b>&lt;0.001</b> |
|                  |                      | Muscle concentration    | 2,60 | <i>F</i> =0.56  | 0.458            |
|                  |                      | Equilibrium potential   | 2,52 | <i>F</i> =5.51  | <b>0.023</b>     |

*t*-tests were used to compare ion concentrations and equilibrium potentials between control crickets and crickets exposed to 0°C for 12 h. General linear models were then used to examine the effect of prolonged cold exposure (up to 120 h) on ion concentrations and equilibrium potentials and include control crickets only if there was no difference between control and 12 h. *P*-values in bold denote significant effects of cold exposure on the response variable.

Table S2. Results of false discovery rate corrected *t*-tests and general linear models of hemolymph and tissue water content of *Gryllus pennsylvanicus* exposed to 0°C

| Test                 | Tissue    | d.f. | Statistic       | <i>P</i>         |
|----------------------|-----------|------|-----------------|------------------|
| <i>t</i> -test       | Hemolymph | 11   | <i>t</i> =1.35  | 0.603            |
|                      | Muscle    | 10   | <i>t</i> =0.70  | 0.782            |
|                      | Gut total | 11   | <i>t</i> =0.55  | 0.782            |
|                      | Foregut   | 13   | <i>t</i> =1.97  | 0.070            |
|                      | Midgut    | 13   | <i>t</i> =2.15  | 0.051            |
|                      | Hindgut   | 13   | <i>t</i> =3.11  | <b>0.008</b>     |
| General linear model | Hemolymph | 2,49 | <i>F</i> =88.68 | <b>&lt;0.001</b> |
|                      | Muscle    | 2,63 | <i>F</i> =1.20  | 0.277            |
|                      | Gut total | 2,51 | <i>F</i> =7.13  | <b>0.010</b>     |
|                      | Foregut   | 2,60 | <i>F</i> =2.12  | <b>0.038</b>     |
|                      | Midgut    | 2,60 | <i>F</i> =44.68 | <b>&lt;0.001</b> |
|                      | Hindgut   | 2,52 | <i>F</i> =0.28  | 0.597            |

*t*-tests were used to compare water content between control crickets and crickets exposed to 0°C for 6 h. General linear models were then used to examine the effect of prolonged cold exposure (up to 120 h) on water content, and include control crickets only if there was no difference between control and 6 h. *P*-values in bold denote significant effects of cold exposure on water content.

Table S3. Results of false discovery rate corrected t-tests and general linear models of hemolymph, foregut, midgut and hindgut ion content of *Gryllus pennsylvanicus* exposed to 0°C

| Ion              | Test                 | Tissue    | d.f. | Statistic | P                |
|------------------|----------------------|-----------|------|-----------|------------------|
| Na <sup>+</sup>  | t-test               | Hemolymph | 13   | $t=2.61$  | 0.068            |
|                  |                      | Foregut   | 13   | $t=1.60$  | 0.322            |
|                  |                      | Midgut    | 13   | $t=4.10$  | <b>0.006</b>     |
|                  |                      | Hindgut   | 13   | $t=5.42$  | <b>0.001</b>     |
|                  | General linear model | Hemolymph | 2,66 | $F=97.78$ | <b>&lt;0.001</b> |
|                  |                      | Foregut   | 2,57 | $F=2.77$  | <b>0.008</b>     |
|                  |                      | Midgut    | 2,60 | $F=4.83$  | <b>0.032</b>     |
|                  |                      | Hindgut   | 2,52 | $F=12.96$ | <b>&lt;0.001</b> |
| K <sup>+</sup>   | t-test               | Hemolymph | 13   | $t=1.98$  | 0.085            |
|                  |                      | Foregut   | 14   | $t=0.65$  | 0.631            |
|                  |                      | Midgut    | 14   | $t=2.91$  | <b>0.044</b>     |
|                  |                      | Hindgut   | 14   | $t=0.11$  | 0.915            |
|                  | General linear model | Hemolymph | 2,67 | $F=0.10$  | 0.758            |
|                  |                      | Foregut   | 2,57 | $F=2.03$  | 0.160            |
|                  |                      | Midgut    | 2,52 | $F=4.95$  | <b>0.031</b>     |
|                  |                      | Hindgut   | 2,60 | $F=3.21$  | 0.078            |
| Mg <sup>2+</sup> | t-test               | Hemolymph | 13   | $t=2.37$  | 0.068            |
|                  |                      | Foregut   | 13   | $t=1.27$  | 0.405            |
|                  |                      | Midgut    | 14   | $t=0.91$  | 0.572            |
|                  |                      | Hindgut   | 12   | $t=1.85$  | 0.264            |
|                  | General linear model | Hemolymph | 2,66 | $F=61.60$ | <b>&lt;0.001</b> |
|                  |                      | Foregut   | 2,53 | $F=0.48$  | 0.491            |
|                  |                      | Midgut    | 2,60 | $F=19.44$ | <b>&lt;0.001</b> |
|                  |                      | Hindgut   | 2,60 | $F=2.54$  | 0.116            |
| Ca <sup>2+</sup> | t-test               | Hemolymph | 13   | $t=1.863$ | 0.085            |
|                  |                      | Foregut   | 13   | $t=1.46$  | 0.334            |
|                  |                      | Midgut    | 14   | $t=0.78$  | 0.597            |
|                  |                      | Hindgut   | 14   | $t=0.44$  | 0.727            |
|                  | General linear model | Hemolymph | 2,65 | $F=67.53$ | <b>&lt;0.001</b> |
|                  |                      | Foregut   | 2,55 | $F=0.85$  | 0.359            |
|                  |                      | Midgut    | 2,60 | $F=21.58$ | <b>&lt;0.001</b> |
|                  |                      | Hindgut   | 2,60 | $F=1.64$  | 0.205            |

t-tests were used to compare ion content between control crickets and crickets exposed to 0°C for 6 h. General linear models were then used to examine the effect of prolonged cold exposure (up to 120 h) on ion content, and include control crickets only if there was no difference between control and 6 h. P-values in bold denote significant effects of cold exposure on ion content.
